# Supplementary material
Source: ML conference proceedings conference paper supplement (https://proceedings.neurips.cc/paper_files/paper/2022/hash/28f699175783a2c828ae74d53dd3da20-Abstract.html)
Supplement: Supplementary file 1 [file 28f699175783a2c828ae74d53dd3da20-Supplemental-Conference.zip]

Archive with 8 entries (8 files):
- AVLEN_supplementary_doc.pdf
- code/ddppo_trainer.py
- code/policy.py
- code/ppo.py
- code/ppo_trainer.py
- code/readme.txt
- qualitative.zip
- readme.txt
