# Supplementary material
Source: ML conference proceedings conference paper supplement (https://proceedings.neurips.cc/paper_files/paper/2022/hash/28f699175783a2c828ae74d53dd3da20-Abstract.html)
Supplement: Supplementary file 1 [file 28f699175783a2c828ae74d53dd3da20-Supplemental-Conference.zip › code/policy.py]

#!/usr/bin/env python3

# Copyright (c) Facebook, Inc. and its affiliates.
# All rights reserved.

# This source code is licensed under the license found in the
# LICENSE file in the root directory of this source tree.

import abc
import logging
import itertools

import torch
import torch.nn as nn
from torchsummary import summary
import sys
import clip

from soundspaces.tasks.nav import PoseSensor, SpectrogramSensor, LocationBelief, CategoryBelief, Category
from ss_baselines.common.utils import CategoricalNet
from ss_baselines.av_nav.models.rnn_state_encoder import RNNStateEncoder
from ss_baselines.savi.models.visual_cnn import VisualCNN
from ss_baselines.savi.models.audio_cnn import AudioCNN
from ss_baselines.savi.models.smt_state_encoder import SMTStateEncoder
from ss_baselines.savi.models.dialog_state_encoder import DialogStateEncoder
from ss_baselines.savi.models.smt_cnn import SMTCNN

# --------------------------------------
from ss_baselines.savi.models.dialog_encoder import DialogEncoder

import pynvml
from pynvml.smi import nvidia_smi
pynvml.nvmlInit()

DUAL_GOAL_DELIMITER = ','


class Policy(nn.Module):
    def __init__(self, net, dim_actions, dim_actions_option=2):
        super().__init__()
        self.net = net
        self.dim_actions = dim_actions
        self.dim_actions_option = dim_actions_option

        self.action_distribution_option = CategoricalNet(
            self.net.output_size, self.dim_actions_option
        )
        
        self.action_distribution_goal = CategoricalNet(
            self.net.output_size, self.dim_actions
        )

        self.action_distribution_vln = CategoricalNet(
            self.net.output_size, self.dim_actions
        )
        
        self.critic_goal = CriticHead(self.net.output_size)
        self.critic_option = CriticHead(self.net.output_size)
        self.uncertainty_option = CriticHead2(self.net.output_size)
        self.critic_vln = CriticHead(self.net.output_size)
        '''
        # for sequential
        self.seq_proj = nn.Linear(25, 3125)
        '''

    def forward(self, *x):
        raise NotImplementedError

    def act(
        self,
        observations,
        rnn_hidden_states,
        prev_actions,
        masks,
        ext_memory,
        ext_memory_masks,
        deterministic=False,
        
    ):
        features, rnn_hidden_states, ext_memory_feats = self.net(
            observations, rnn_hidden_states, prev_actions, masks, ext_memory, ext_memory_masks 
        )
        
        
        distribution, _ = self.action_distribution_goal(features)
        value = self.critic_goal(features)

        if deterministic:
            action = distribution.mode()
        else:
            action = distribution.sample()

        action_log_probs = distribution.log_probs(action)

        return value, action, action_log_probs, rnn_hidden_states, ext_memory_feats, distribution.probs

    def act_option(
        self,
        observations,
        rnn_hidden_states,
        prev_actions,
        masks,
        ext_memory,
        ext_memory_masks,
        query_state,
        last_query_info,
        deterministic=False,
        
    ):
        features, rnn_hidden_states, ext_memory_feats = self.net(
            observations, rnn_hidden_states, prev_actions, masks, ext_memory, ext_memory_masks, query_state, last_query_info, 
        )
        
        
        distribution, _ = self.action_distribution_option(features)
        value = self.critic_option(features)
        unct = self.uncertainty_option(features)

        if deterministic:
            action = distribution.mode()
        else:
            action = distribution.sample()

        action_log_probs = distribution.log_probs(action)

        return value, unct, action, action_log_probs, rnn_hidden_states, ext_memory_feats, distribution.probs
  

    def act_dialog(
        self,
        observations,
        rnn_hidden_states,
        prev_actions,
        masks,
        ext_memory,
        ext_memory_dialog,
        ext_memory_masks,
        all_dialog,
        agent_step,
        deterministic=False,
        without_dialog=False,
    ):
        if without_dialog:
            all_dialog=None

        features, rnn_hidden_states, ext_memory_feats, ext_memory_dialog_feats  = self.net(
            observations, rnn_hidden_states, prev_actions, masks, ext_memory, ext_memory_dialog, ext_memory_masks, all_dialog, agent_step 
        )
        
        distribution, _ = self.action_distribution_vln(features)
        value = self.critic_vln(features)

        # action = distribution.mode()
        if deterministic:
            action = distribution.mode()
        else:
            action = distribution.sample()

        action_log_probs = distribution.log_probs(action)

        return value, action, action_log_probs, rnn_hidden_states, ext_memory_feats, ext_memory_dialog_feats, distribution.probs   

    def get_value(self, observations, rnn_hidden_states, prev_actions, masks, ext_memory, ext_memory_masks): 
        features, _, _ = self.net(
            observations, rnn_hidden_states, prev_actions, masks, ext_memory, ext_memory_masks
        )
        return self.critic_goal(features)

    def get_value_option(self, observations, rnn_hidden_states, prev_actions, masks, ext_memory, ext_memory_masks, query_state, last_query_info): 
        features, _, _ = self.net(
            observations, rnn_hidden_states, prev_actions, masks, ext_memory, ext_memory_masks, query_state, last_query_info,
        )
        return self.critic_option(features)

    
    def get_value_dialog(self, observations, rnn_hidden_states, prev_actions, masks, ext_memory, ext_memory_masks, all_dialog): # , query_state
        features, _, _, _ = self.net(
            observations, rnn_hidden_states, prev_actions, masks, ext_memory, ext_memory_dialog, ext_memory_masks, all_dialog
        )
        return self.critic_vln(features)
    
    def evaluate_actions(
        self,
        observations,
        rnn_hidden_states,
        prev_actions,
        masks,
        action,
        ext_memory,
        ext_memory_masks,
        
    ):
        
        features, rnn_hidden_states, ext_memory_feats = self.net(
            observations, rnn_hidden_states, prev_actions,
            masks, ext_memory, ext_memory_masks
        )
        distribution, _ = self.action_distribution_goal(features)
        value = self.critic_goal(features)
        
        action_log_probs = distribution.log_probs(action)
        distribution_entropy = distribution.entropy().mean()

        return value, action_log_probs, distribution_entropy, rnn_hidden_states, ext_memory_feats

    def evaluate_actions_option(
        self,
        observations,
        rnn_hidden_states,
        prev_actions,
        masks,
        action,
        ext_memory,
        ext_memory_masks,
        query_state,
        last_query_info,
        
    ):
        # print(f"Used GPU memory inside evaluate before self.net- {nvidia_smi.getInstance().DeviceQuery('memory.used')}")
                  
        features, rnn_hidden_states, ext_memory_feats = self.net(
            observations, rnn_hidden_states, prev_actions,
            masks, ext_memory, ext_memory_masks, query_state, last_query_info,
        )
        # print(f"Used GPU memory inside evaluate after self.net- {nvidia_smi.getInstance().DeviceQuery('memory.used')}")
                
        distribution, _ = self.action_distribution_option(features)
        value = self.critic_option(features)
        unct = self.uncertainty_option(features)

        action_log_probs = distribution.log_probs(action)
        distribution_entropy = distribution.entropy().mean()

        return value, unct, action_log_probs, distribution_entropy, rnn_hidden_states, ext_memory_feats, distribution.probs


    def evaluate_actions_dialog(
        self,
        observations,
        rnn_hidden_states,
        prev_actions,
        masks,
        action,
        ext_memory,
        ext_memory_dialog,
        ext_memory_masks,
        all_dialog,
        # query_state,
        # agent_step_state
        agent_step,
        without_dialog=False,
    ):
        '''
        features, rnn_hidden_states, ext_memory_feats, ext_memory_dialog_feats = self.net(
            observations, rnn_hidden_states, prev_actions,
            masks, ext_memory, ext_memory_dialog, ext_memory_masks, all_dialog, # query_state,
            agent_step_state
        )
        '''
        if without_dialog:
            all_dialog=None

        features, rnn_hidden_states, ext_memory_feats, ext_memory_dialog_feats = self.net(
            observations, rnn_hidden_states, prev_actions,
            masks, ext_memory, ext_memory_dialog, ext_memory_masks, all_dialog, # query_state,
            agent_step
        )
        distribution, logit = self.action_distribution_vln(features)
        # value = self.critic(features)
        value = None
        
        action_log_probs = distribution.log_probs(action)
        distribution_entropy = distribution.entropy().mean()

        return value, action_log_probs, distribution_entropy, rnn_hidden_states, ext_memory_feats, ext_memory_dialog_feats, logit


class CriticHead(nn.Module):
    def __init__(self, input_size):
        super().__init__()
        self.fc = nn.Linear(input_size, 1)
        nn.init.orthogonal_(self.fc.weight)
        nn.init.constant_(self.fc.bias, 0)

    def forward(self, x):
        return self.fc(x)

class CriticHead2(nn.Module):
    def __init__(self, input_size):
        super().__init__()
        self.fc = nn.Linear(input_size, 2)
        nn.init.orthogonal_(self.fc.weight)
        nn.init.constant_(self.fc.bias, 0)

    def forward(self, x):
        return self.fc(x)

class AudioNavBaselinePolicy(Policy):
    def __init__(
        self,
        observation_space,
        action_space,
        goal_sensor_uuid,
        hidden_size=512,
        extra_rgb=False,
        use_mlp_state_encoder=False
    ):
        super().__init__(
            AudioNavBaselineNet(
                observation_space=observation_space,
                hidden_size=hidden_size,
                goal_sensor_uuid=goal_sensor_uuid,
                extra_rgb=extra_rgb,
                use_mlp_state_encoder=use_mlp_state_encoder
            ),
            action_space.n,
        )


class AudioNavSMTPolicy(Policy):
    def __init__(self, observation_space, action_space, hidden_size=128, **kwargs):
        super().__init__(
            AudioNavSMTNet(
                observation_space,
                action_space,
                hidden_size=hidden_size,
                **kwargs
            ),
            action_space.n
        )


class AudioNavDialogPolicy(Policy):
    def __init__(self, observation_space, action_space, hidden_size=128, **kwargs):
        super().__init__(
            AudioNavDialogNet(
                observation_space,
                action_space,
                hidden_size=hidden_size,
                **kwargs
            ),
            action_space.n
        )
        
class AudioNavOptionPolicy(Policy):
    def __init__(self, observation_space, action_space, hidden_size=128, **kwargs):
        super().__init__(
            AudioNavOptionNet(
                observation_space,
                action_space,
                hidden_size=hidden_size,
                **kwargs
            ),
            2 # number of action
        )

class Net(nn.Module, metaclass=abc.ABCMeta):
    @abc.abstractmethod
    def forward(self, observations, rnn_hidden_states, prev_actions, masks):
        pass

    @property
    @abc.abstractmethod
    def output_size(self):
        pass

    @property
    @abc.abstractmethod
    def num_recurrent_layers(self):
        pass

    @property
    @abc.abstractmethod
    def is_blind(self):
        pass


class AudioNavBaselineNet(Net):
    r"""Network which passes the input image through CNN and concatenates
    goal vector with CNN's output and passes that through RNN.
    """

    def __init__(self, observation_space, hidden_size, goal_sensor_uuid, extra_rgb=False, use_mlp_state_encoder=False):
        super().__init__()
        self.goal_sensor_uuid = goal_sensor_uuid
        self._hidden_size = hidden_size
        self._audiogoal = False
        self._pointgoal = False
        self._n_pointgoal = 0
        self._label = 'category' in observation_space.spaces

        # for goal descriptors
        self._use_label_belief = False
        self._use_location_belief = False
        self._use_mlp_state_encoder = use_mlp_state_encoder

        if DUAL_GOAL_DELIMITER in self.goal_sensor_uuid:
            goal1_uuid, goal2_uuid = self.goal_sensor_uuid.split(DUAL_GOAL_DELIMITER)
            self._audiogoal = self._pointgoal = True
            self._n_pointgoal = observation_space.spaces[goal1_uuid].shape[0]
        else:
            if 'pointgoal_with_gps_compass' == self.goal_sensor_uuid:
                self._pointgoal = True
                self._n_pointgoal = observation_space.spaces[self.goal_sensor_uuid].shape[0]
            else:
                self._audiogoal = True

        self.visual_encoder = VisualCNN(observation_space, hidden_size, extra_rgb)
        if self._audiogoal:
            if 'audiogoal' in self.goal_sensor_uuid:
                audiogoal_sensor = 'audiogoal'
            elif 'spectrogram' in self.goal_sensor_uuid:
                audiogoal_sensor = 'spectrogram'
            self.audio_encoder = AudioCNN(observation_space, hidden_size, audiogoal_sensor)

        rnn_input_size = (0 if self.is_blind else self._hidden_size) + \
                         (self._n_pointgoal if self._pointgoal else 0) + \
                         (self._hidden_size if self._audiogoal else 0) + \
                         (observation_space.spaces['category'].shape[0] if self._label else 0) + \
                         (observation_space.spaces[CategoryBelief.cls_uuid].shape[0] if self._use_label_belief else 0) + \
                         (observation_space.spaces[LocationBelief.cls_uuid].shape[0] if self._use_location_belief else 0)
        if not self._use_mlp_state_encoder:
            self.state_encoder = RNNStateEncoder(rnn_input_size, self._hidden_size)
        else:
            self.state_encoder = nn.Linear(rnn_input_size, self._hidden_size)

        if not self.visual_encoder.is_blind:
            summary(self.visual_encoder.cnn, self.visual_encoder.input_shape, device='cpu')
        if self._audiogoal:
            audio_shape = observation_space.spaces[audiogoal_sensor].shape
            summary(self.audio_encoder.cnn, (audio_shape[2], audio_shape[0], audio_shape[1]), device='cpu')

        self.train()

    @property
    def output_size(self):
        return self._hidden_size

    @property
    def is_blind(self):
        return self.visual_encoder.is_blind

    @property
    def num_recurrent_layers(self):
        if self._use_mlp_state_encoder:
            return 1
        else:
            return self.state_encoder.num_recurrent_layers

    def forward(self, observations, rnn_hidden_states, prev_actions, masks, ext_memory=None, ext_memory_masks=None):
        x = []

        if self._pointgoal:
            x.append(observations[self.goal_sensor_uuid.split(DUAL_GOAL_DELIMITER)[0]])
        if self._audiogoal:
            x.append(self.audio_encoder(observations))
        if not self.is_blind:
            x.append(self.visual_encoder(observations))
        if self._label:
            x.append(observations['category'].to(device=x[0].device))

        if self._use_label_belief:
            x.append(observations[CategoryBelief.cls_uuid])
        if self._use_location_belief:
            x.append(observations[LocationBelief.cls_uuid])

        x1 = torch.cat(x, dim=1)
        if self._use_mlp_state_encoder:
            x2 = self.state_encoder(x1)
            rnn_hidden_states1 = x2
        else:
            x2, rnn_hidden_states1 = self.state_encoder(x1, rnn_hidden_states, masks)

        assert not torch.isnan(x2).any().item()

        return x2, rnn_hidden_states1, None

    def get_features(self, observations, prev_actions):
        x = []

        if self._pointgoal:
            x.append(observations[self.goal_sensor_uuid.split(DUAL_GOAL_DELIMITER)[0]])
        if self._audiogoal:
            x.append(self.audio_encoder(observations))
        if not self.is_blind:
            x.append(self.visual_encoder(observations))
        if self._label:
            x.append(observations['category'].to(device=x[0].device))

        if self._use_label_belief:
            x.append(observations[CategoryBelief.cls_uuid])
        if self._use_location_belief:
            x.append(observations[LocationBelief.cls_uuid])

        x = torch.cat(x, dim=1)

        return x


class AudioNavSMTNet(Net):
    r"""Network which passes the input image through CNN and concatenates
    goal vector with CNN's output and passes that through RNN. Implements the
    policy from Scene Memory Transformer: https://arxiv.org/abs/1903.03878
    """

    def __init__(
        self,
        observation_space,
        action_space,
        hidden_size=128,
        use_pretrained=False,
        pretrained_path='',
        use_belief_as_goal=True,
        use_label_belief=True,
        use_location_belief=True,
        use_belief_encoding=False,
        normalize_category_distribution=False,
        use_category_input=False,
        **kwargs
    ):
        super().__init__()
        self._use_action_encoding = True
        self._use_residual_connection = False
        self._use_belief_as_goal = use_belief_as_goal
        self._use_label_belief = use_label_belief
        self._use_location_belief = use_location_belief
        self._hidden_size = hidden_size
        self._action_size = action_space.n
        self._use_belief_encoder = use_belief_encoding
        self._normalize_category_distribution = normalize_category_distribution
        self._use_category_input = use_category_input
        
        assert SpectrogramSensor.cls_uuid in observation_space.spaces
        self.goal_encoder = AudioCNN(observation_space, 128, SpectrogramSensor.cls_uuid)
        audio_feature_dims = 128

        self.visual_encoder = SMTCNN(observation_space)
        if self._use_action_encoding:
            self.action_encoder = nn.Linear(self._action_size, 16)
            action_encoding_dims = 16
        else:
            action_encoding_dims = 0
        nfeats = self.visual_encoder.feature_dims + action_encoding_dims + audio_feature_dims

        if self._use_category_input:
            nfeats += 21

        # Add pose observations to the memory
        assert PoseSensor.cls_uuid in observation_space.spaces
        if PoseSensor.cls_uuid in observation_space.spaces:
            pose_dims = observation_space.spaces[PoseSensor.cls_uuid].shape[0]
            # Specify which part of the memory corresponds to pose_dims
            pose_indices = (nfeats, nfeats + pose_dims)
            nfeats += pose_dims
        else:
            pose_indices = None
        
        self._feature_size = nfeats
        

        self.smt_state_encoder = SMTStateEncoder(
            nfeats,
            dim_feedforward=hidden_size,
            pose_indices=pose_indices,
            **kwargs
        )
        
        self.state_size = self.smt_state_encoder.hidden_state_size
        if self._use_residual_connection:
            self.state_size += self._feature_size
        
        if self._use_belief_encoder:
            self.belief_encoder = nn.Linear(self._hidden_size, self._hidden_size)

        if use_pretrained:
            assert(pretrained_path != '')
            self.pretrained_initialization(pretrained_path)

        self.train()

    @property
    def memory_dim(self):
        return self._feature_size

    
    @property
    def output_size(self):
        size = self.smt_state_encoder.hidden_state_size
        if self._use_residual_connection:
            size += self._feature_size
        return size

    @property
    def is_blind(self):
        return False

    @property
    def num_recurrent_layers(self):
        return -1

    def forward(self, observations, rnn_hidden_states, prev_actions, masks, ext_memory, ext_memory_masks):
        x = self.get_features(observations, prev_actions)
        
        if self._use_belief_as_goal:
            belief = torch.zeros((x.shape[0], self._hidden_size), device=x.device)
            if self._use_label_belief:
                if self._normalize_category_distribution:
                    belief[:, :21] = nn.functional.softmax(observations[CategoryBelief.cls_uuid], dim=1)
                else:
                    belief[:, :21] = observations[CategoryBelief.cls_uuid]

            if self._use_location_belief:
                belief[:, 21:23] = observations[LocationBelief.cls_uuid]

            if self._use_belief_encoder:
                belief = self.belief_encoder(belief)
        else:
            belief = None

        x_att = self.smt_state_encoder(x, ext_memory, ext_memory_masks, goal=belief)
        if self._use_residual_connection:
            x_att = torch.cat([x_att, x], 1)
        
        return x_att, rnn_hidden_states, x
        

    def _get_one_hot(self, actions):
        if actions.shape[1] == self._action_size:
            return actions
        else:
            N = actions.shape[0]
            actions_oh = torch.zeros(N, self._action_size, device=actions.device)
            actions_oh.scatter_(1, actions.long(), 1)
            return actions_oh

    def pretrained_initialization(self, path):
        logging.info(f'AudioNavSMTNet ===> Loading pretrained model from {path}')
        state_dict = torch.load(path)['state_dict']
        cleaned_state_dict = {
            k[len('actor_critic.net.'):]: v for k, v in state_dict.items()
            if 'actor_critic.net.' in k
        }
        self.load_state_dict(cleaned_state_dict, strict=False)

    def freeze_encoders(self):
        """Freeze goal, visual and fusion encoders. Pose encoder is not frozen."""
        logging.info(f'AudioNavSMTNet ===> Freezing goal, visual, fusion encoders!')
        params_to_freeze = []
        params_to_freeze.append(self.goal_encoder.parameters())
        params_to_freeze.append(self.visual_encoder.parameters())
        if self._use_action_encoding:
            params_to_freeze.append(self.action_encoder.parameters())
        for p in itertools.chain(*params_to_freeze):
            p.requires_grad = False

    def set_eval_encoders(self):
        """Sets the goal, visual and fusion encoders to eval mode."""
        self.goal_encoder.eval()
        self.visual_encoder.eval()

    def get_features(self, observations, prev_actions):
        x = []
        x.append(self.visual_encoder(observations))
        x.append(self.action_encoder(self._get_one_hot(prev_actions)))
        x.append(self.goal_encoder(observations))
        if self._use_category_input:
            x.append(observations[Category.cls_uuid])

        x.append(observations[PoseSensor.cls_uuid])

        x = torch.cat(x, dim=1)

        return x


class AudioNavDialogNet(Net):
    r"""Network which passes the input image through CNN and concatenates
    goal vector with CNN's output and passes that through RNN. Implements the
    policy from Scene Memory Transformer: https://arxiv.org/abs/1903.03878
    """

    def __init__(
        self,
        observation_space,
        action_space,
        hidden_size=128,
        use_pretrained=False,
        pretrained_path='',
        use_belief_as_goal=True,
        use_label_belief=True,
        use_location_belief=True,
        use_belief_encoding=False,
        normalize_category_distribution=False,
        use_category_input=False,
        # query_count_emb_size = 32,
        # agent_step_emb_size = 128,
        num_steps = 5,
        **kwargs
    ):
        super().__init__()
        self._use_action_encoding = True
        self._use_residual_connection = False
        self._use_belief_as_goal = use_belief_as_goal
        self._use_label_belief = use_label_belief
        self._use_location_belief = use_location_belief
        self._hidden_size = hidden_size
        self._action_size = action_space.n
        self._use_belief_encoder = use_belief_encoding
        self._normalize_category_distribution = normalize_category_distribution
        self._use_category_input = use_category_input
        # self._query_count_emb_size = query_count_emb_size
        # self._agent_step_emb_size = agent_step_emb_size
        self._num_steps = num_steps
        
        assert SpectrogramSensor.cls_uuid in observation_space.spaces
        self.goal_encoder = AudioCNN(observation_space, 128, SpectrogramSensor.cls_uuid)
        audio_feature_dims = 128

        self.visual_encoder = SMTCNN(observation_space)
        if self._use_action_encoding:
            self.action_encoder = nn.Linear(self._action_size, 16)
            action_encoding_dims = 16
        else:
            action_encoding_dims = 0
        nfeats = self.visual_encoder.feature_dims + action_encoding_dims + audio_feature_dims

        '''
        if self._use_category_input:
            nfeats += 21
        '''


        # Add pose observations to the memory
        # assert PoseSensor.cls_uuid in observation_space.spaces
        if PoseSensor.cls_uuid in observation_space.spaces:
            pose_dims = observation_space.spaces[PoseSensor.cls_uuid].shape[0]
            # Specify which part of the memory corresponds to pose_dims
            pose_indices = (nfeats, nfeats + pose_dims)
            nfeats += pose_dims
            self.pose_dims = pose_dims
        else:
            pose_indices = None
        '''
        # also adding query state
        nfeats += self._query_count_emb_size
        '''
        self._feature_size = nfeats        

        self.smt_state_encoder = SMTStateEncoder(
            nfeats,
            dim_feedforward=hidden_size,
            pose_indices=pose_indices,
            **kwargs
        )
        
        # self.dialog_encoder = DialogEncoder()
        # clip
        self.clip, _ = clip.load("ViT-B/32")  #, device='cpu'
        self.dialog_layer = nn.Linear(self.clip.transformer.width, self._hidden_size)
        
        self.dialog_state_encoder = DialogStateEncoder(
            hidden_size + self._hidden_size, # hope it matches
            dim_feedforward=hidden_size,
            **kwargs
        )
        
        self.state_size = self.smt_state_encoder.hidden_state_size
        if self._use_residual_connection:
            self.state_size += self._feature_size
        # self.state_modifier = nn.Linear(self.state_size+self.dialog_encoder.encoded_dim, self.state_size)
        
        # for agent_step_state
        # self.agent_step_emb = nn.Embedding(self._num_steps, self._agent_step_emb_size)
        # self.agent_step_emb.weight.data.uniform_(-1, 1)

        if self._use_belief_encoder:
            self.belief_encoder = nn.Linear(self._hidden_size, self._hidden_size)

        if use_pretrained:
            assert(pretrained_path != '')
            self.pretrained_initialization(pretrained_path)

        self.train()

    @property
    def memory_dim(self):
        return self._feature_size
    
    @property
    def output_size(self):
        size = self.smt_state_encoder.hidden_state_size
        if self._use_residual_connection:
            size += self._feature_size
        return size

    @property
    def is_blind(self):
        return False

    @property
    def num_recurrent_layers(self):
        return -1

    def forward(self, observations, rnn_hidden_states, prev_actions, masks, ext_memory, ext_memory_dialog, ext_memory_masks, all_dialog, agent_step): # step_emb
        x = self.get_features(observations, prev_actions)
        # ---------------------------
        # x = torch.cat([x, query_state], 1)

        if self._use_belief_as_goal:
            belief = torch.zeros((x.shape[0], self._hidden_size), device=x.device)
            if self._use_label_belief:
                if self._normalize_category_distribution:
                    belief[:, :21] = nn.functional.softmax(observations[CategoryBelief.cls_uuid], dim=1)
                else:
                    belief[:, :21] = observations[CategoryBelief.cls_uuid]

            if self._use_location_belief:
                belief[:, 21:23] = observations[LocationBelief.cls_uuid]

            if self._use_belief_encoder:
                belief = self.belief_encoder(belief)
        else:
            belief = None

        # print('x', x.size())  # [6, 276
        # print('ext_memory', ext_memory.size())  # [3, 6, 297]
        # print('self.pose_dims', self.pose_dims) # 4

        '''
        if self._use_category_input:
            ext_memory = torch.cat([ext_memory[:,:,:272], ext_memory[:,:,293:]],  dim=-1)
        ''' 
        x_att = self.smt_state_encoder(x, ext_memory, ext_memory_masks, goal=belief)
        '''
        if self._use_residual_connection:  # it needs to be modified for dialog based navigation
            x_att = torch.cat([x_att, x], 1)
        '''  
        # -------------------------------------
        # add the dialog part
        # dialog: (B, max_seq_length)
        # dialog_emb: (B, self.dialog_encoder.encoded_dim)  


        if all_dialog!=None:
            # dialog_emb = self.dialog_encoder(all_dialog)   
            # clip
            with torch.no_grad():
                dialog_emb = self.clip.encode_text(all_dialog).float()
            dialog_emb = self.dialog_layer(dialog_emb)
        else: 
            dialog_emb = None

        '''
        # change   # why this??---------
        dialog_encoding = dialog_encoding[:x_att_dialog.size()[0],:]  
        '''
        # x_att_dialog = self.dialog_state_encoder(x_att, ext_memory_dialog, ext_memory_masks, dialog_emb, goal=step_emb)  #  should not be goal ------------------
        x_att_dialog = self.dialog_state_encoder(x_att, ext_memory_dialog, ext_memory_masks, dialog_emb, agent_step, goal=belief)  

        '''
        if self._use_residual_connection: # it needs to be modified for dialog based navigation
            x_att_dialog = torch.cat([x_att_dialog, x], 1)
        '''
        # print('x_att.size(), dialog_encoding.size()', x_att.size(), dialog_encoding.size())
        # x_modified = self.state_modifier(torch.cat((x_att_dialog, dialog_encoding), dim=1)) 

        return x_att_dialog, rnn_hidden_states, x, x_att_dialog
        # return x_att, rnn_hidden_states, x
        

    def _get_one_hot(self, actions):
        if actions.shape[1] == self._action_size:
            return actions
        else:
            N = actions.shape[0]
            actions_oh = torch.zeros(N, self._action_size, device=actions.device)
            actions_oh.scatter_(1, actions.long(), 1)
            return actions_oh

    def pretrained_initialization(self, path):
        logging.info(f'AudioDialogNet ===> Loading pretrained model from {path}')
        state_dict = torch.load(path)['state_dict']
        cleaned_state_dict = {
            k[len('actor_critic.net.'):]: v for k, v in state_dict.items()
            if 'actor_critic.net.' in k
        }
        self.load_state_dict(cleaned_state_dict, strict=False)

    def freeze_encoders(self):
        """Freeze goal, visual and fusion encoders. Pose encoder is not frozen."""
        logging.info(f'AudioDialogNet ===> Freezing goal, visual, fusion encoders!')
        params_to_freeze = []
        params_to_freeze.append(self.goal_encoder.parameters())
        params_to_freeze.append(self.visual_encoder.parameters())
        if self._use_action_encoding:
            params_to_freeze.append(self.action_encoder.parameters())
        for p in itertools.chain(*params_to_freeze):
            p.requires_grad = False

    def set_eval_encoders(self):
        """Sets the goal, visual and fusion encoders to eval mode."""
        self.goal_encoder.eval()
        self.visual_encoder.eval()

    def get_features(self, observations, prev_actions):
        x = []
        x.append(self.visual_encoder(observations))
        x.append(self.action_encoder(self._get_one_hot(prev_actions)))
        x.append(self.goal_encoder(observations))
        '''
        if self._use_category_input:
            x.append(observations[Category.cls_uuid])
        '''
        x.append(observations[PoseSensor.cls_uuid])

        x = torch.cat(x, dim=1)

        return x


class AudioNavOptionNet(Net):
    
    def __init__(
        self,
        observation_space,
        action_space,
        hidden_size=128,

        # configuration
        use_pretrained=False,
        pretrained_path='',
        use_belief_as_goal=True,
        use_label_belief=True,
        use_location_belief=True,
        use_belief_encoding=False,
        normalize_category_distribution=False,
        use_category_input=False,
        query_count_emb_size = 32,
        **kwargs
    ):
        super().__init__()
        self._use_action_encoding = True
        self._use_residual_connection = False
        self._use_belief_as_goal = use_belief_as_goal
        self._use_label_belief = use_label_belief
        self._use_location_belief = use_location_belief
        self._hidden_size = hidden_size
        self._action_size = action_space.n
        self._use_belief_encoder = use_belief_encoding
        self._normalize_category_distribution = normalize_category_distribution
        self._use_category_input = use_category_input
        self._query_count_emb_size = query_count_emb_size

        assert SpectrogramSensor.cls_uuid in observation_space.spaces
        self.goal_encoder = AudioCNN(observation_space, 128, SpectrogramSensor.cls_uuid)
        audio_feature_dims = 128

        self.visual_encoder = SMTCNN(observation_space)
        if self._use_action_encoding:
            self.action_encoder = nn.Linear(self._action_size, 16)
            action_encoding_dims = 16
        else:
            action_encoding_dims = 0
        nfeats = self.visual_encoder.feature_dims + action_encoding_dims + audio_feature_dims
        
        if self._use_category_input:
            nfeats += 21
        
        # Add pose observations to the memory
        assert PoseSensor.cls_uuid in observation_space.spaces
        if PoseSensor.cls_uuid in observation_space.spaces:
            pose_dims = observation_space.spaces[PoseSensor.cls_uuid].shape[0]
            # Specify which part of the memory corresponds to pose_dims
            pose_indices = (nfeats, nfeats + pose_dims)
            nfeats += pose_dims
        else:
            pose_indices = None

        # also adding query state
        nfeats += self._query_count_emb_size    
        
        self._feature_size = nfeats

        
        self.smt_state_encoder = SMTStateEncoder(
            nfeats,
            dim_feedforward=hidden_size,
            pose_indices=pose_indices,
            use_query_count=False,
            **kwargs
        )
        self.state_size = self.smt_state_encoder.hidden_state_size
        if self._use_residual_connection:
            self.state_size += self._feature_size
        self.policy_selector = nn.Linear(self.state_size, 2)
        
        # for query state
        self._qcnt_emb = nn.Embedding(2, self._query_count_emb_size) 

        if self._use_belief_encoder:
            self.belief_encoder = nn.Linear(self._hidden_size, self._hidden_size)

        if use_pretrained:
            assert(pretrained_path != '')
            self.pretrained_initialization(pretrained_path)

        self.train()

    @property
    def memory_dim(self):
        return self._feature_size
    
    @property
    def qcnt_emb(self):
        return self._qcnt_emb
    

    @property
    def output_size(self):
        size = self.smt_state_encoder.hidden_state_size
        if self._use_residual_connection:
            size += self._feature_size
        return size

    @property
    def is_blind(self):
        return False

    @property
    def num_recurrent_layers(self):
        return -1

    def forward(self, observations, rnn_hidden_states, prev_actions, masks, ext_memory, ext_memory_masks, query_state, last_query_info):
        x = self.get_features(observations, prev_actions)
        # i guess (b, feat)
        # print('x.size()', x.size()) # 8,276
        # print('ext_memory.size()', ext_memory.size())  # [300, 8, 276]        
        # print('query_state', query_state.size()) # 8,32
        # sys.exit()

        
        with torch.no_grad():
            x_query = torch.cat([x, query_state], 1)
            # ext_memory_query = torch.cat([ext_memory, query_state.unsqueeze(0).repeat(ext_memory.size()[0], 1, 1)], 2)        
        

        if self._use_belief_as_goal:
            belief = torch.zeros((x.shape[0], self._hidden_size), device=x.device)
            if self._use_label_belief:
                if self._normalize_category_distribution:
                    belief[:, :21] = nn.functional.softmax(observations[CategoryBelief.cls_uuid], dim=1)
                else:
                    belief[:, :21] = observations[CategoryBelief.cls_uuid]

            if self._use_location_belief:
                belief[:, 21:23] = observations[LocationBelief.cls_uuid]

            if self._use_belief_encoder:
                belief = self.belief_encoder(belief)
        else:
            belief = None
          
        # x_att = self.smt_state_encoder(x_query, ext_memory_query, ext_memory_masks, goal=belief)
        x_att = self.smt_state_encoder(x_query, ext_memory, ext_memory_masks, goal=belief)
        # x_att = self.smt_state_encoder(x, ext_memory, ext_memory_masks, goal=belief)
        if self._use_residual_connection:
            x_att = torch.cat([x_att, x], 1)
        
        with torch.no_grad():
            x_for_memory = torch.cat([x, last_query_info], 1)
            
        return x_att, rnn_hidden_states, x_for_memory
        

    def _get_one_hot(self, actions):
        if actions.shape[1] == self._action_size:
            return actions
        else:
            N = actions.shape[0]
            actions_oh = torch.zeros(N, self._action_size, device=actions.device)
            actions_oh.scatter_(1, actions.long(), 1)
            return actions_oh

    def pretrained_initialization(self, path):
        logging.info(f'AudioOptionNet ===> Loading pretrained model from {path}')
        state_dict = torch.load(path)['state_dict']
        cleaned_state_dict = {
            k[len('actor_critic.net.'):]: v for k, v in state_dict.items()
            if 'actor_critic.net.' in k
        }
        self.load_state_dict(cleaned_state_dict, strict=False)

    def freeze_encoders(self):
        """Freeze goal, visual and fusion encoders. Pose encoder is not frozen."""
        logging.info(f'AudioNavOptionNet ===> Freezing goal, visual, fusion encoders!')
        params_to_freeze = []
        params_to_freeze.append(self.goal_encoder.parameters())
        params_to_freeze.append(self.visual_encoder.parameters())
        if self._use_action_encoding:
            params_to_freeze.append(self.action_encoder.parameters())
        for p in itertools.chain(*params_to_freeze):
            p.requires_grad = False

    def set_eval_encoders(self):
        """Sets the goal, visual and fusion encoders to eval mode."""
        self.goal_encoder.eval()
        self.visual_encoder.eval()

    def get_features(self, observations, prev_actions):
        x = []
        x.append(self.visual_encoder(observations))
        x.append(self.action_encoder(self._get_one_hot(prev_actions)))
        x.append(self.goal_encoder(observations))
        if self._use_category_input:
            x.append(observations[Category.cls_uuid])

        x.append(observations[PoseSensor.cls_uuid])

        x = torch.cat(x, dim=1)

        return x
