# Supplementary material
Source: ML conference proceedings conference paper supplement (https://proceedings.neurips.cc/paper_files/paper/2022/hash/28f699175783a2c828ae74d53dd3da20-Abstract.html)
Supplement: Supplementary file 1 [file 28f699175783a2c828ae74d53dd3da20-Supplemental-Conference.zip › code/readme.txt]

Our code is built on top of SAVi codebase. We provide four important python files which cover the algorithm of our proposed AVLEN approach. 

ddppo_trainer.py: Base code to take rollout steps and update policy based on collected experience.  
ppo_trainer.py: Contains rollout collection function and the model evaluation code.
policy.py: Defines model architecture
ppo.py: Python script for updationg model using proximal policy optimization.
